# Supplementary material for: Effect of Farnesol in Trichoderma Physiology and in Fungal–Plant Interaction
Source: MDPI journal article supplement (doi:10.3390/jof8121266), 2022-11-30
Supplement: s1 [file s1]

## Supplementary material

# Effect of farnesol in *Trichoderma* physiology and in fungal-plant interaction

Rosa E. Cardoza <sup>1</sup>, Susan P. McCormick <sup>2</sup>, Laura Lindo <sup>1</sup>, Sara Mayo-Prieto <sup>3</sup>, David González-Cazón <sup>1</sup>, Natalia Martínez-Reyes <sup>1</sup>, Guzmán Carro-Huerga <sup>3</sup>, Álvaro Rodríguez-González <sup>3</sup>, Robert H. Proctor <sup>2</sup>, Pedro A. Casquero <sup>3</sup> and Santiago Gutiérrez <sup>1,\*</sup>

**Table S1.** Oligonucleotides used in the current study.

| Name                                                                                                 |               | Sequence 5′-3′            |                |
|------------------------------------------------------------------------------------------------------|---------------|---------------------------|----------------|
| Construction of pTCdpp1-b1 to overexpress <i>T. harzianum dpp1</i> gene                              |               |                           |                |
| Th-dpp1 5F                                                                                           |               | ATGCCTTCTGTGCGCACCG       |                |
| Th-dpp1 3R                                                                                           |               | TCAGCTTCGTCGAGTTCCTA      |                |
| Analysis of <i>dpp1</i> overexpressed transformants, and to amplify a probe for Southern experiments |               |                           |                |
| Th-dpp1-E4-1F                                                                                        |               | ATCCCTCTAGGCGTCTCAT       |                |
| Th-dpp1-E4-3R                                                                                        |               | TACCTTGCTCTTCTTCGTCCC     |                |
| TADIR2                                                                                               |               | TGACCACTTCGCTGCCTATC      |                |
| Th-dpp1-E4-1R                                                                                        |               | GAGGACGTTGGGTTTGATGT      |                |
| Amplification of <i>ble</i> gene to be used as a probe in Southern experiments                       |               |                           |                |
| Phleo-3                                                                                              |               | GGTGTGGTCGGCGTCGG         |                |
| Phleo-4                                                                                              |               | TGGGTGTGGGTGCGCGG         |                |
| Oligos for qPCR analysis of <i>Trichoderma</i> terpene-related genes                                 |               |                           |                |
| Gene                                                                                                 | Oligo name    | Sequence 5′-3′            | Efficiency (%) |
| actin                                                                                                | aactinF       | ACTGGGACGACATGGAGAAG      | 92             |
|                                                                                                      | aactinR       | GGCCTGGATGGAGACATAGA      |                |
| <i>hmgR</i>                                                                                          | Th hmgR 1F    | ACGAGGAGGTCGTTGAGCTA      | 101            |
|                                                                                                      | Th hmgR 1R    | TAGTGCCTGTAGGGCAGCTT      |                |
| <i>erg1</i>                                                                                          | erg1-1F       | CGTCGAGACAGAGGTTGTCA      | 90             |
|                                                                                                      | erg1-1R       | GCTTTCGAAACTTGGAGTCG      |                |
| <i>erg7</i>                                                                                          | Th-erg7-F     | ACTGGATCAGGACCAACCAG      | 107            |
|                                                                                                      | Th-erg7-R     | GCTTTCAGACCAACCACCAT      |                |
| <i>erg9</i>                                                                                          | Th-erg9-1F    | GGCAGACTACGCACAAAACA      | 101            |
|                                                                                                      | Th-erg9-1R    | GTTAGGCCTTCACCAACCAA      |                |
| <i>dpp1</i>                                                                                          | Th-dpp1 1F    | ATCCCTCTAGGCGTCTCAT       | 89             |
|                                                                                                      | Th-dpp1 1R    | GAGGACGTTGGGTTTGATGT      |                |
| Oligos for qPCR analysis of <i>Trichoderma</i> genes related with regulation of circadian cycle      |               |                           |                |
| Gene                                                                                                 | Oligo name    | Sequence 5′-3′            | Efficiency (%) |
| <i>laeA</i>                                                                                          | Th-laeA 1F    | AGAACAACAGGCGCTACCAT      | 90             |
|                                                                                                      | Th-laeA 1R    | ATTCTGTGGGTTCTCCAACG      |                |
| <i>veA</i>                                                                                           | Th-vea 1F     | CAGCTTGTACGAGACGACCA      | 102            |
|                                                                                                      | Th-vea 1R     | ATGAGTCCGGGGAACCTTCTT     |                |
| <i>velB</i>                                                                                          | Th-velB-E1 4F | GTCAATCAGCAACCGCAGTA      | 106            |
|                                                                                                      | Th-velB-E1 4R | GGGGGTAGTTTGCAGTGTGT      |                |
| Oligos for qPCR analysis of tomato genes related with defense and growth                             |               |                           |                |
| Gene                                                                                                 | Oligo name    | Sequence 5′-3′            | Efficiency (%) |
| <i>actin</i>                                                                                         | Actin-F       | CACCACTGCTGAACGGGAA       | 114            |
|                                                                                                      | Actin-R       | GGAGCTGCTCCTGGCAGTTT      |                |
| <i>PR1b1</i>                                                                                         | PR1b1F        | GCACTAAACCTAAAGAAAAATGGG  | 112            |
|                                                                                                      | PR1b1R        | AAGTTGGCATCCCAAGACATA     |                |
| <i>PR-P2</i>                                                                                         | PR-P2F        | GGAACAGGAACACAAGAAACAGTGA | 113            |
|                                                                                                      | PR-P2R        | CCCAATCCATTAGTGTCCAATCG   |                |
| <i>PIN1</i>                                                                                          | PIN1F         | TGAAACTCTCATGGCACGAAAAG   | 108            |
|                                                                                                      | PIN1R         | GGCCACATTTGTTTTCTTCG      |                |

|                |          |                       |     |
|----------------|----------|-----------------------|-----|
| <i>PINII</i>   | PINIIF   | GGCCAAATGCTTGACCTTT   | 114 |
|                | PINIIR   | CGTGGTACATCCGGTGGGATA |     |
| <i>TomLoxA</i> | TomLoxAF | TGAACCATGGTGGGCTGAAA  | 95  |
|                | TomLoxAR | CTGCCCCGAAATTGACTGCTG |     |
| <i>ACCS</i>    | ACCSF    | TGAGTTGGTGAACCATGGAA  | 104 |
|                | ACCSR    | GCTTGAACAGCCTCAAGTCC  |     |
| <i>SUCS</i>    | SUCSF    | ATGAACCGAGTGAGGAATGG  | 106 |
|                | SUCSR    | GCTGGACCACCGTGATTAGT  |     |
| <i>GAI</i>     | GAIF     | ACCTCCGGTGAACAATCAAG  | 92  |
|                | GAIR     | GAACGCATTTGAACCCAGAT  |     |

**Table S2.** Genomic sequences of *Trichoderma* spp. that were retrieved from the National Center for Biotechnology Information (NCBI) database for their use in the phylogenetic analysis carried out in the current study [31].

| Species                                      | GenBank accession number | Reference                                                                                                                                                                                                                                                                                                        |
|----------------------------------------------|--------------------------|------------------------------------------------------------------------------------------------------------------------------------------------------------------------------------------------------------------------------------------------------------------------------------------------------------------|
| <i>Trichoderma asperellum</i> CBS 433.97     | GCF_003025105.1          | Druzhinina, I.S.; Chenthamara, K.; Zhang, J.; et al. Massive lateral transfer of genes encoding plant cell wall-degrading enzymes to the mycoparasitic fungus <i>Trichoderma</i> from its plant-associated hosts. <i>PLoS Genet.</i> <b>2018.</b> 14, e1007322. doi: 10.1371/journal.pgen.1007322.               |
| <i>Trichoderma citrinoviride</i> TUCIM 6016  | GCF_003025115.1          |                                                                                                                                                                                                                                                                                                                  |
| <i>Trichoderma guizhouense</i> NJAU 4742     | GCA_002022785.1          |                                                                                                                                                                                                                                                                                                                  |
| <i>Trichoderma atroviride</i> IMI 206040     | GCF_000171015.1          | Kubicek, C.P.; Herrera-Estrella, A.; Seidl-Seiboth, V.; et al.. Comparative genome sequence analysis underscores mycoparasitism as the ancestral life style of <i>Trichoderma</i> . <i>Genome Biol.</i> <b>2011.</b> 12, R40. doi: 10.1186/gb-2011-12-4-r40                                                      |
| <i>Trichoderma virens</i> Gv29-8             | GCF_000170995.1          |                                                                                                                                                                                                                                                                                                                  |
| <i>Trichoderma hamatum</i> GD12              | GCA_000331835.2          | Studholme, D.J.; Harris, B.; Le Cocq, K.; et al. Investigating the beneficial traits of <i>Trichoderma hamatum</i> GD12 for sustainable agriculture-insights from genomics. <i>Front. Plant Sci.</i> <b>2013.</b> 4,258. doi: 10.3389/fpls.2013.00258.                                                           |
| <i>Trichoderma arundinaceum</i> IBT 40837    | GCA_003012105.1          | Proctor, R.H.; McCormick, S.P.; Kim, H.S.; et al. Evolution of structural diversity of trichothecenes, a family of toxins produced by plant pathogenic and entomopathogenic fungi. <i>PLoS Pathog.</i> <b>2018.</b> 14, e1006946. doi: 10.1371/journal.ppat.1006946                                              |
| <i>Trichoderma brevicompactum</i> IBT 40841  | GCA_003012085.1          |                                                                                                                                                                                                                                                                                                                  |
| <i>Trichoderma atrobrunneum</i> ITEM 908     | GCA_003439915.1          | Fanelli, F.; Liuzzi, V.C.; Logrieco, A.F.; et al. Genomic characterization of <i>Trichoderma atrobrunneum</i> ( <i>T. harzianum</i> species complex) ITEM 908: insight into the genetic endowment of a multi-target biocontrol strain. <i>BMC Genomics.</i> <b>2018.</b> 19: 662. doi: 10.1186/s12864-018-5049-3 |
| <i>Trichoderma koningii</i> JCM 1883         | GCA_001950475.1          | Manabe, R.; Endoh, R.; Uzuhashi, S.; et al. <i>Trichoderma koningii</i> strain JCM 1883, whole genome shotgun sequencing project. <b>2016.</b> Direct submission.                                                                                                                                                |
| <i>Trichoderma koningiopsis</i> POS7         | GCA_002246995.1          | Castrillo, M.L.; Bich, G.A.; Modenutti, C.P.; et al. First whole-genome shotgun sequence of a promising cellulase secretor, <i>Trichoderma koningiopsis</i> strain POS7. <i>Genome Announc.</i> <b>2017.</b> 5: e00823-17. doi: 10.1128/genomeA.00823-17                                                         |
| <i>Trichoderma lentiforme</i> CFAM-422       | GCA_011066345.1          | Steindorff, A.S.; Formighieri, E.F.; Midorikawa, G.E.O.; et al.. <i>Trichoderma lentiforme</i> strain CFAM-422, whole genome shotgun sequence project. <b>2018.</b> Direct submission.                                                                                                                           |
| <i>Trichoderma oligosporum</i> CGMCC 3.17527 | GCA_015266385.1          | Wang, C.; Zeng, Z.; Zhuang, W.; Comparative molecular evolution of chitinases in Ascomycota with emphasis on mycoparasitism lifestyle. <b>2020.</b> Direct submission.                                                                                                                                           |
| <i>Trichoderma parareesei</i> CBS125925      | GCA_001050175.1          | Yang, D.; Pomraning, K.; Kopchinskiy, A.; et al. Genome sequence and annotation of <i>Trichoderma parareesei</i> , the ancestor of the cellulase producer <i>Trichoderma reesei</i> . <i>Genome Announc.</i> <b>2017.</b> 3, e00885. doi: 10.1128/genomeA.00885-15                                               |
| <i>Trichoderma reesei</i> QM6a               | GCF_000167675.1          | Li, W.C.; Huang, C.H.; Chen, C.L.; et al. <i>Trichoderma reesei</i> complete genome sequence, repeat-induced point mutation, and partitioning of CAZyme gene clusters. <i>Biotechnol Biofuels.</i> <b>2017.</b> 10, 170. doi: 10.1186/s13068-017-0825-x                                                          |

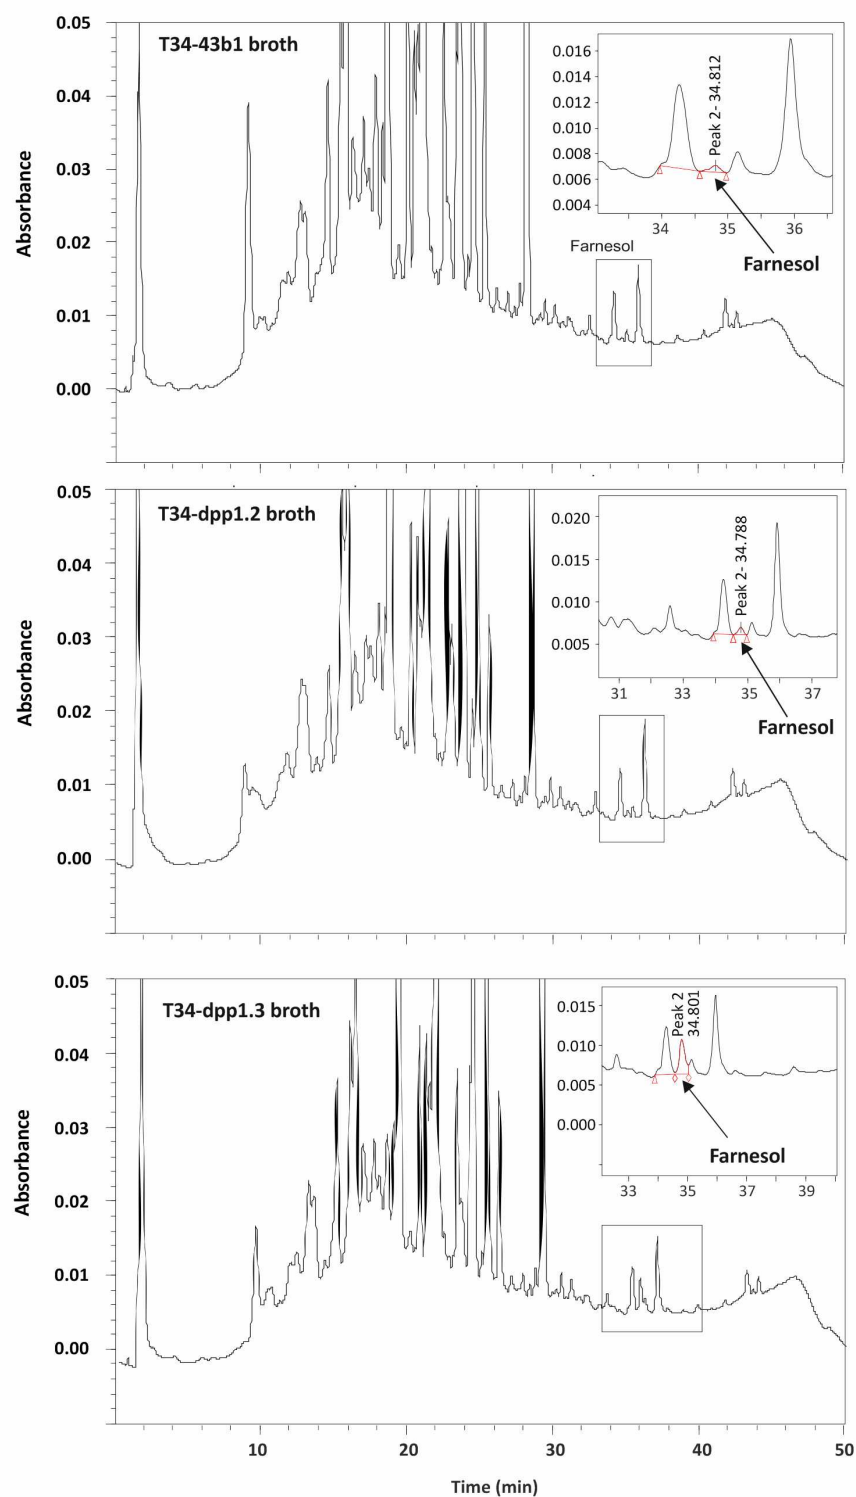

**Figure S1.** HPLC chromatograms showing the peaks corresponding to the farnesol production detected in 96 h culture broths of T34-43b.1 (**upper panel**), T34-dpp1.2 (**middle panel**) and T34-dpp1.3 (**bottom panel**) strains. Production of farnesol was deduced from the area of the farnesol peak using a calibration curve performed with different known concentrations of pure farnesol.

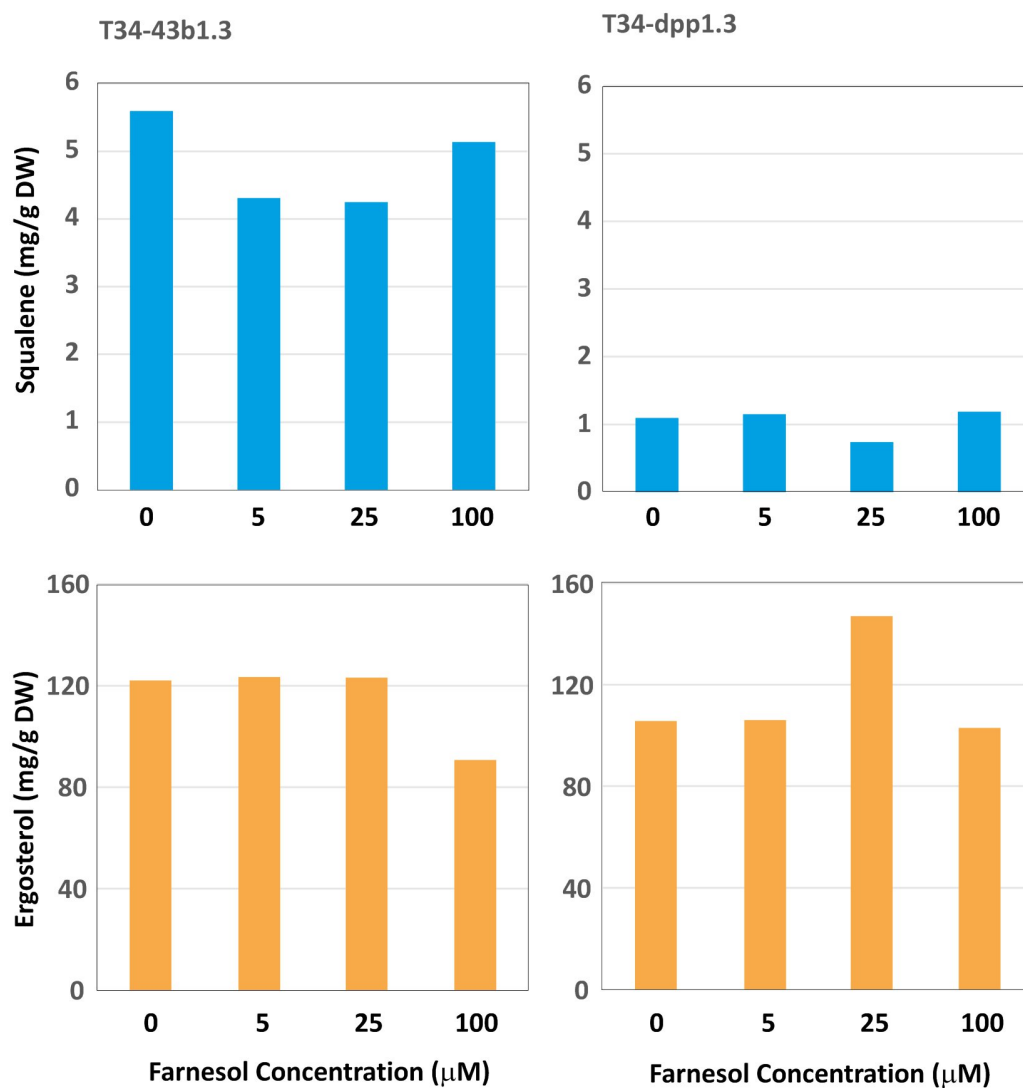

**Figure S2.** Level of squalene (**upper panels**) and ergosterol (**bottom panels**) produced in mycelia of strains T34-43b1.3 (**left panels**) and T34-dpp1.3 (**right panels**) grown for 96 h at 28 °C in minimal medium amended with farnesol at 0, 5, 25 or 100 μM. mg/g DW= milligrams of squalene or ergosterol per gram of freeze-dried mycelia.

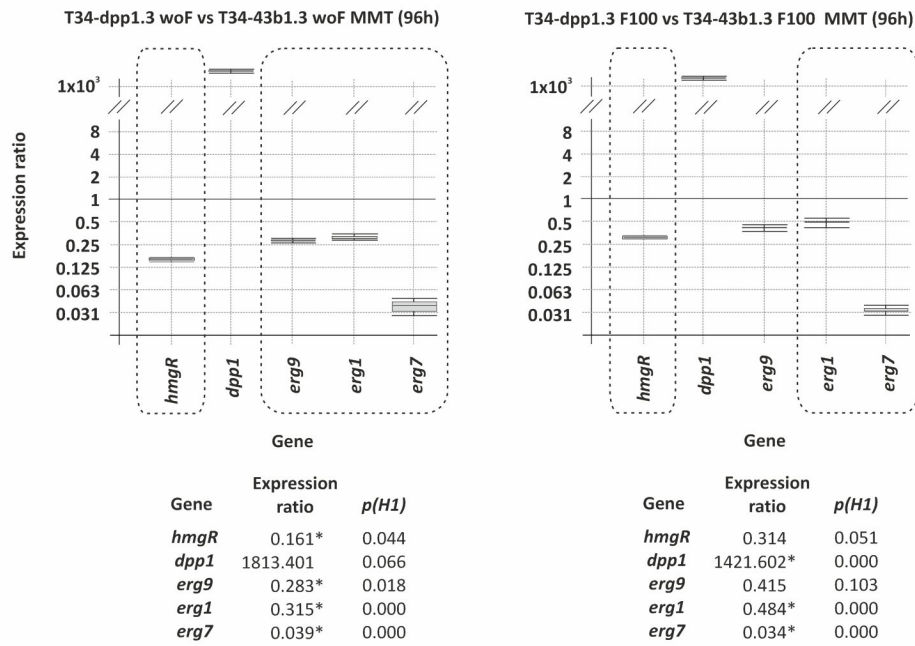

**Figure S3.** Analysis by qPCR of relative expression levels of five genes involved in ergosterol biosynthetic pathway in the transformant T34-dpp1.3 versus expression in the control strain T34-43b1.3. The study was carried out from mycelia grown for 96 h in minimal medium (MMT) without farnesol (**left panel**) and amended with farnesol 100  $\mu$ M (F100) (**right panel**). The data analysis and the graphic representation were performed as described in the legend to **Fig. 3**.

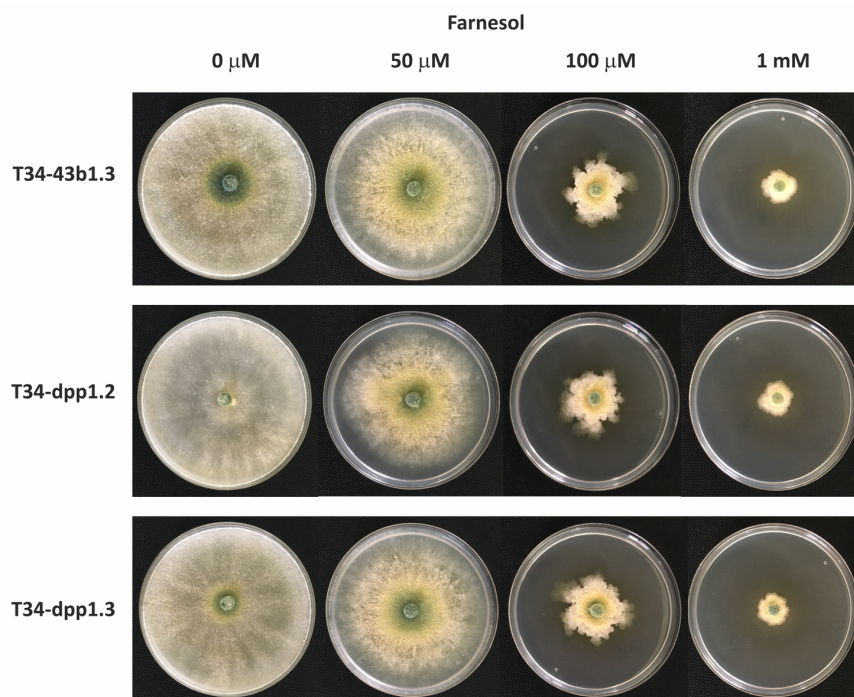

**Figure S4.** Effect of farnesol on growth of wild-type strain (T34-43b1.3) and the two *dpp1*-overexpressing transformants selected in the present work (T34-dpp1.2 and T34-dpp1.3). The plates were incubated for 7 days at 28 °C. Left panels correspond to the control condition without external addition of farnesol.

***Candida albicans***

0  $\mu$ M farnesol

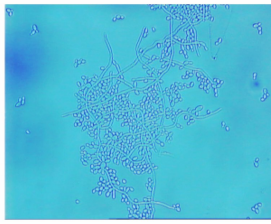

0.063  $\mu$ M farnesol

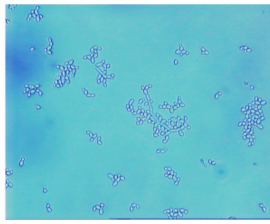

0.63  $\mu$ M farnesol

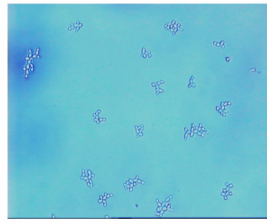

***Saccharomyces cerevisiae***

0  $\mu$ M farnesol

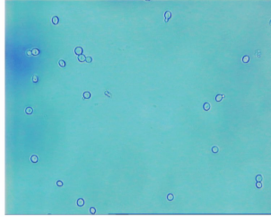

0.63  $\mu$ M farnesol

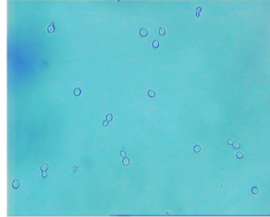

6.33  $\mu$ M farnesol

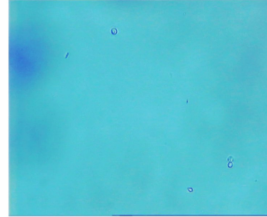

63.3  $\mu$ M farnesol

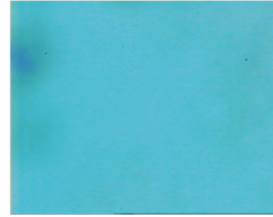

**Figure S5.** Toxicity of farnesol against *Candida albicans* (upper panel), and *Saccharomyces cerevisiae* (bottom panel).

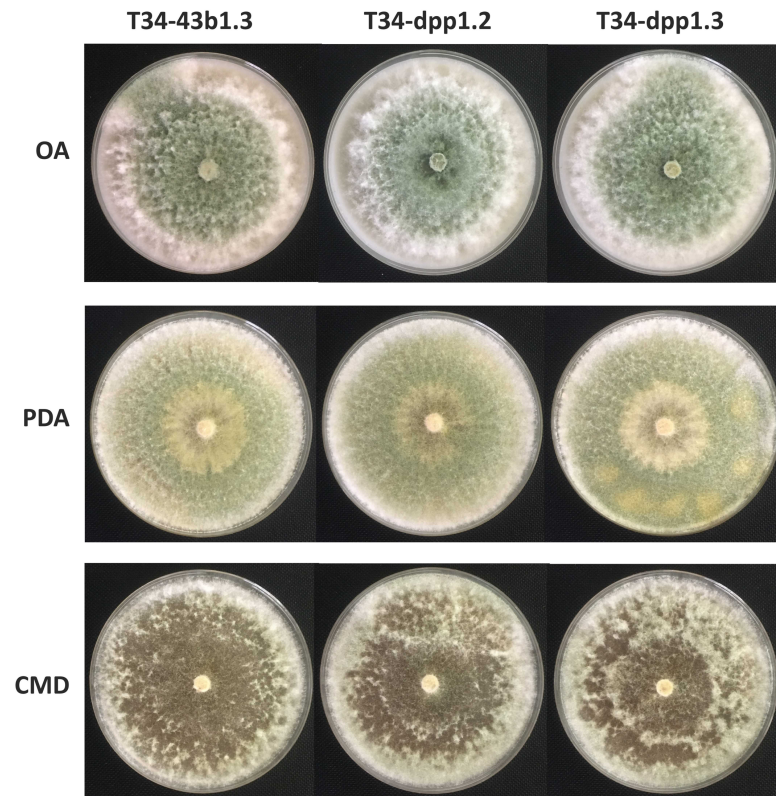

**Figure S6.** Effect of *dpp1* overexpression on growth in different media. Strains were grown for 14 days at 28 °C.

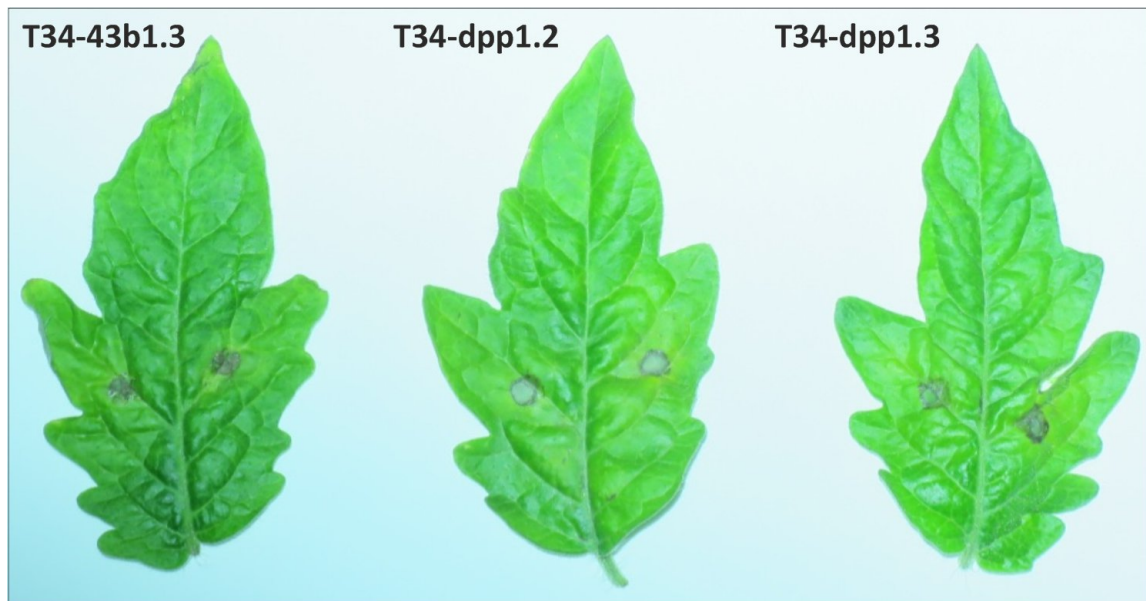

**Figure S7.** Antifungal assay on tomato leaves of 96 h PDB culture broths from T34-43b1.3 (control strain) and two *dpp1*-overexpressing transformants, against *Botrytis cinerea* B05.10.

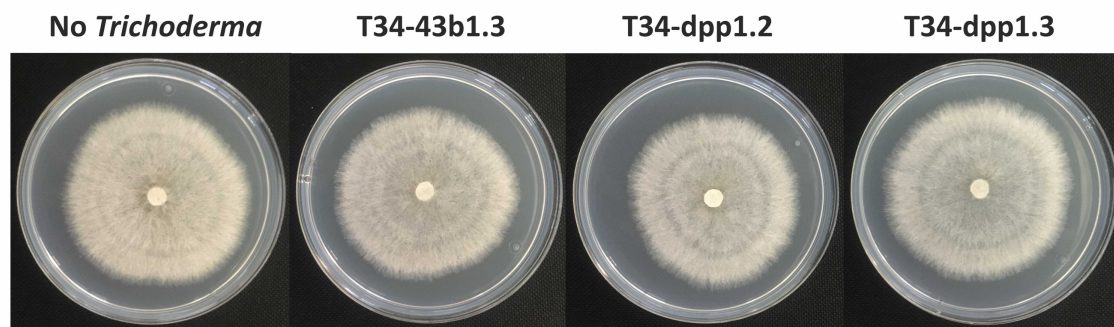

**Figure S8.** Effect of *T. harzianum* strains T34-43b1.3 (control strain), T34-dpp1.2 and T34-dpp1.3 (*dpp1*-overexpressing transformants) on growth of *R. solani* strain R43 in an antifungal membrane assay. Plate at the left corresponds to a control experiment in which no *Trichoderma* plug was placed on the plate before removal the cellophane membrane. Plates were incubated at 28 °C for four days after placement of the *R. solani* plug.
